# Supplementary material for: Potentially Toxic Metals in the Tropical Mangrove Non-Salt Secreting Rhizophora apiculata: A Field-Based Biomonitoring Study and Phytoremediation Potentials
Source: MDPI journal article supplement (doi:10.3390/f14020237), 2023-01-27
Supplement: s1 [file s1]

*Supplementary Materials*

# **Potentially toxic metals in the tropical mangrove *Rhizophora apiculata*: A field-based biomonitoring study and phytoremediation potentials**

**Chee Kong Yap<sup>1\*</sup> and Khalid Awadh Al-Mutairi<sup>2</sup>**

<sup>1</sup> Department of Biology, Faculty of Science, Universiti Putra Malaysia, Serdang 43400 UPM, Selangor, Malaysia

<sup>2</sup> Department of Biology, Faculty of Science, University of Tabuk, Tabuk P.O. Box 741, Saudi Arabia; kmutairi@ut.edu.sa

\* Correspondence: yapckong@hotmail.com or yapchee@upm.edu.my

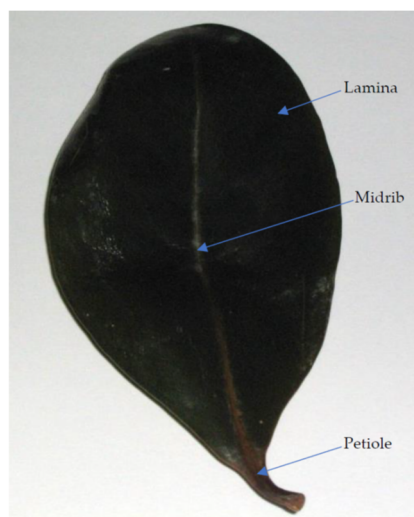

**Figure S1.** Parts of leaves (midrib plus petiole, and lamina) of mangrove (*Rhizophora apiculata*) investigated in the present study. .

**Table S1.** Sampling information in the mangrove areas of Sepang Besar River (1-4), and Lukut River (5-9) from the present study.

| Site | Latitude      | Longitude     | Description of sampling site                         | Temp  | Cond (µs/cm) | Salinity (ppt) |
|------|---------------|---------------|------------------------------------------------------|-------|--------------|----------------|
| 1    | 02° 36.653' N | 101° 42.345'E | Prawns hatchery area.                                | 27.99 | 34919        | 20.59          |
| 2    | 02° 36.102' N | 101° 42.337'E | Mangrove area                                        | 28.01 | 36619        | 21.69          |
| 3    | 02° 36.042' N | 101° 42.461'E | Mangrove area                                        | 27.87 | 36677        | 21.79          |
| 4    | 02° 35.933' N | 101° 42.826'E | Mangrove area                                        | 28.36 | 40491        | 24.07          |
| 5    | 02° 34.978' N | 101° 47.607'E | Mangrove area; nearby a construction site            | 29.89 | 33343        | 18.81          |
| 6    | 02° 34.979' N | 101° 47.668'E | Mangrove area                                        | 29.83 | 28452        | 15.82          |
| 7    | 02° 34.847' N | 101° 47.795'E | Mangrove area                                        | 29.40 | 29706        | 16.73          |
| 8    | 02° 34.853' N | 101° 47.882'E | Mangrove area                                        | 29.73 | 33140        | 18.75          |
| 9    | 02° 34.737' N | 101° 48.033'E | Mangrove area; boating activity; nearby construction | 30.14 | 28093        | 15.50          |

**Table S2.** Heavy metals analysis recovery percentages of the certified reference materials (CRM).

| CRM                    | Cu    | Fe    | Ni   | Pb    | Zn    |
|------------------------|-------|-------|------|-------|-------|
| NSC DC73319 Soil China | 85.0% | NA    | NA   | 99.8% | 99.7% |
| MESS - 3 NRC           | 93.1% | NA    | 102% | 116%  | 82.8% |
| TH-1 Sediment Canada   | 92.9% | 95.6% | 112% | 100%  | 110%  |
| SRM 1547               | NA    | 106%  | NA   | NA    | 115%  |
| IAEA Soil-5            | 91.3% | NA    | 103% | 116%  | 94.8% |

NA - data not available.

**Table S3.** Mean concentrations (mg/kg dry weight) of Zn in the leaf parts (lamina (L); midrib plus petiole (MP)) of *Rhizophora apiculata* and their habitat geochemical fraction sediments, with their bioconcentration factor (BCF) values in the mangrove of Sepang Besar River (1-4), and Lukut River (5-9) from the present study.

| Site | Part | Plant | F1   | F2   | F3   | F4   | SUM  | Total | BCF1 | BCF2 | BCF3 | BCF4 | BCF5 |
|------|------|-------|------|------|------|------|------|-------|------|------|------|------|------|
| 1    | L    | 13.4  | 0.94 | 14.2 | 34.1 | 60.7 | 110  | 82.1  | 14.3 | 0.94 | 0.39 | 0.22 | 0.12 |
| 2    | L    | 19.0  | 1.53 | 15.8 | 22.5 | 26.6 | 66.5 | 74.8  | 12.4 | 1.20 | 0.84 | 0.71 | 0.29 |
| 3    | L    | 16.4  | 1.55 | 19.1 | 43.8 | 41.7 | 106  | 88.3  | 10.6 | 0.86 | 0.37 | 0.39 | 0.15 |
| 4    | L    | 8.62  | 1.25 | 13.5 | 14.5 | 22.4 | 51.7 | 64.9  | 6.90 | 0.64 | 0.59 | 0.38 | 0.17 |
| 5    | L    | 15.0  | 4.84 | 15.0 | 18.8 | 15.7 | 54.3 | 45.5  | 3.09 | 1.00 | 0.80 | 0.95 | 0.28 |
| 6    | L    | 18.1  | 2.54 | 26.2 | 37.3 | 35.7 | 102  | 79.3  | 7.13 | 0.69 | 0.48 | 0.51 | 0.18 |
| 7    | L    | 9.74  | 2.04 | 22.3 | 34.0 | 38.9 | 97.2 | 74.3  | 4.77 | 0.44 | 0.29 | 0.25 | 0.10 |
| 8    | L    | 7.28  | 2.03 | 19.9 | 23.5 | 32.7 | 78.1 | 62.0  | 3.59 | 0.37 | 0.31 | 0.22 | 0.09 |
| 9    | L    | 15.0  | 2.71 | 24.1 | 33.3 | 28.4 | 88.5 | 74.4  | 5.53 | 0.62 | 0.45 | 0.53 | 0.17 |
| 1    | MP   | 9.99  | 0.94 | 14.2 | 34.1 | 60.7 | 110  | 82.1  | 10.6 | 0.70 | 0.29 | 0.16 | 0.09 |
| 2    | MP   | 14.2  | 1.53 | 15.8 | 22.5 | 26.6 | 66.5 | 74.8  | 9.29 | 0.90 | 0.63 | 0.53 | 0.21 |
| 3    | MP   | 6.08  | 1.55 | 19.1 | 43.8 | 41.7 | 106  | 88.3  | 3.92 | 0.32 | 0.14 | 0.15 | 0.06 |
| 4    | MP   | 6.76  | 1.25 | 13.5 | 14.5 | 22.4 | 51.7 | 64.9  | 5.41 | 0.50 | 0.46 | 0.30 | 0.13 |
| 5    | MP   | 12.8  | 4.84 | 15.0 | 18.8 | 15.7 | 54.3 | 45.5  | 2.65 | 0.86 | 0.68 | 0.82 | 0.24 |
| 6    | MP   | 10.8  | 2.54 | 26.2 | 37.3 | 35.7 | 102  | 79.3  | 4.24 | 0.41 | 0.29 | 0.30 | 0.11 |
| 7    | MP   | 8.36  | 2.04 | 22.3 | 34.0 | 38.9 | 97.2 | 74.29 | 4.10 | 0.38 | 0.25 | 0.22 | 0.09 |
| 8    | MP   | 7.16  | 2.03 | 19.9 | 23.5 | 32.7 | 78.1 | 62.0  | 3.53 | 0.36 | 0.31 | 0.22 | 0.09 |
| 9    | MP   | 8.72  | 2.71 | 24.1 | 33.3 | 28.4 | 88.5 | 74.4  | 3.22 | 0.36 | 0.26 | 0.31 | 0.10 |

Note: BCF1= leave/F1; BCF2= leave/F2; BCF3= leave/F3; BCF4= leave/F4; BCF5= leave/SUM; F1= easily, freely or exchangeable fraction; F2= acid-reducible fraction; F3= oxidisable-organic fraction; F4= resistant fraction; SUM= summation of F1, F2, F3 and F4.

**Table S4.** Comparisons of concentrations (mg/kg dry weight) of Zn, Cu, Fe, Ni and Pb between surface sediments from this study with those cited from sediment quality guidelines, and reference values.

|                                            | Zn       | Cu        | Fe    | Ni        | Pb       | References                   |
|--------------------------------------------|----------|-----------|-------|-----------|----------|------------------------------|
| <b>Reference values</b>                    |          |           | -     |           |          |                              |
| Pre-industrial reference level             | 175      | 50.0      | -     | NA        | 70.0     | Hakanson [1]                 |
| Upper continental crust                    | 52.0     | 14.3      | 43000 | 19.0      | 17.0     | Wedepohl [2]                 |
| Upper continental crust                    | 71.0     | 25.0      | -     | 44.0      | 17.0     | Taylor and McLennan [3]      |
| Upper continental crust                    | 67.0     | 28.0      | -     | 47.0      | 17.0     | Rudnick and Gao [4]          |
| Background of WCPM                         | -        | 3.55      | -     | -         | -        | Yap <i>et al.</i> [5]        |
| Background of WCPM                         | -        | -         | -     | 7.31      | -        | Yap <i>et al.</i> [6]        |
| Background of WCPM                         | -        | -         | -     | -         | 19.48    | Yap and Noorhaidah [7]       |
| Background of WCPM                         | 13.16    | -         | -     | -         | -        | Yap <i>et al.</i> [8]        |
| Mangrove of west coast of PM               | 29.4-130 | 5.59-28.7 | -     | -         | 25.4-173 | Cheng and Yap [9]            |
| Mangrove of west coast of PM               | -        | -         | -     | 4.33-24.1 | -        | Cheng <i>et al.</i> [10]     |
| <b>Sediment Quality Guidelines</b>         |          |           |       |           |          |                              |
| Effect range low (ERL)                     | 150      | 34.0      | -     | 20.9      | 46.7     | Long <i>et al.</i> [11]      |
| Effects range median (ERM)                 | 410      | 270       | -     | 51.6      | 218      | Long <i>et al.</i> [11]      |
| Threshold effect level (TEL)               | 124      | 18.7      | -     | 15.9      | 30.2     | Macdonald <i>et al.</i> [12] |
| Probable effect level (PEL)                | 271      | 108       | -     | 42.8      | 112      | Macdonald <i>et al.</i> [12] |
| Interim sediment quality value (ISQV)-low  | 200      | 65.0      | -     | 40.0      | 75.0     | Chapman <i>et al.</i> [13]   |
| Interim sediment quality value (ISQV)-high | 410      | 270       | -     | NA        | 218      | Chapman <i>et al.</i> [13]   |

**Table S5.** Mean concentrations (mg/kg dry weight) of Fe in the leaf parts (lamina (L); midrib plus petiole (MP)) of *Rhizophora apiculata* and their habitat geochemical fraction sediments, with their bioconcentration factor (BCF) values in the mangrove of Sepang Besar River (1-4), and Lukut River (5-9) from the present study.

| Site | Part | Plant | F1  | F2   | F3    | F4    | SUM   | Total | BCF1 | BCF2 | BCF3  | BCF4  | BCF5  |
|------|------|-------|-----|------|-------|-------|-------|-------|------|------|-------|-------|-------|
| 1    | L    | 233   | 119 | 1016 | 2197  | 24475 | 27808 | 25512 | 1.95 | 0.23 | 0.106 | 0.010 | 0.008 |
| 2    | L    | 88.4  | 249 | 835  | 3325  | 12560 | 16968 | 17012 | 0.36 | 0.11 | 0.027 | 0.007 | 0.005 |
| 3    | L    | 63.2  | 816 | 1451 | 6380  | 20424 | 29071 | 32489 | 0.08 | 0.04 | 0.010 | 0.003 | 0.002 |
| 4    | L    | 76.4  | 199 | 1102 | 2599  | 18241 | 22140 | 13564 | 0.38 | 0.07 | 0.029 | 0.004 | 0.003 |
| 5    | L    | 303   | 751 | 1618 | 10364 | 17152 | 29885 | 25728 | 0.40 | 0.19 | 0.029 | 0.018 | 0.010 |
| 6    | L    | 337   | 267 | 1536 | 7366  | 28547 | 37716 | 31204 | 1.26 | 0.22 | 0.046 | 0.012 | 0.009 |
| 7    | L    | 260   | 100 | 1013 | 5352  | 29341 | 35805 | 24556 | 2.61 | 0.26 | 0.049 | 0.009 | 0.007 |
| 8    | L    | 349   | 113 | 1149 | 3414  | 24613 | 29289 | 21200 | 3.09 | 0.30 | 0.102 | 0.014 | 0.012 |
| 9    | L    | 424   | 410 | 1755 | 7946  | 22054 | 32166 | 26493 | 1.03 | 0.24 | 0.053 | 0.019 | 0.013 |
| 1    | MP   | 203   | 119 | 1016 | 2197  | 24475 | 27808 | 25512 | 1.70 | 0.20 | 0.093 | 0.008 | 0.007 |
| 2    | MP   | 51.2  | 249 | 835  | 3325  | 12560 | 16968 | 17012 | 0.21 | 0.06 | 0.015 | 0.004 | 0.003 |
| 3    | MP   | 28.6  | 816 | 1451 | 6380  | 20424 | 29071 | 32489 | 0.03 | 0.02 | 0.004 | 0.001 | 0.001 |
| 4    | MP   | 27.1  | 199 | 1102 | 2599  | 18241 | 22140 | 13564 | 0.14 | 0.02 | 0.010 | 0.001 | 0.001 |
| 5    | MP   | 217   | 751 | 1618 | 10364 | 17152 | 29885 | 25728 | 0.29 | 0.13 | 0.021 | 0.013 | 0.007 |
| 6    | MP   | 138   | 267 | 1536 | 7366  | 28547 | 37716 | 31204 | 0.52 | 0.09 | 0.019 | 0.005 | 0.004 |
| 7    | MP   | 138   | 100 | 1013 | 5352  | 29341 | 35805 | 24556 | 1.38 | 0.14 | 0.026 | 0.005 | 0.004 |
| 8    | MP   | 180   | 113 | 1149 | 3414  | 24613 | 29289 | 21200 | 1.59 | 0.16 | 0.053 | 0.007 | 0.006 |
| 9    | MP   | 213.0 | 410 | 1755 | 7946  | 22054 | 32166 | 26493 | 0.52 | 0.12 | 0.027 | 0.010 | 0.007 |

Note: BCF1= leave/F1; BCF2= leave/F2; BCF3= leave/F3; BCF4= leave/F4; BCF5= leave/SUM; F1= easily, freely or exchangeable fraction; F2= acid-reducible fraction; F3= oxidisable-organic fraction; F4= resistant fraction; SUM= summation of F1, F2, F3 and F4.

**Table S6.** Mean concentrations (mg/kg dry weight) of Pb in the leaf parts (lamina (L); midrib plus petiole (MP)) of *Rhizophora apiculata* and their habitat geochemical fraction sediments, with their bioconcentration factor (BCF) values in the mangrove of Sepang Besar River (1-4), and Lukut River (5-9) from the present study.

| Site | Part | Plant | F1   | F2   | F3   | F4   | SUM  | Total | BCF1 | BCF2 | BCF3 | BCF4 | BCF5 |
|------|------|-------|------|------|------|------|------|-------|------|------|------|------|------|
| 1    | L    | 0.42  | 0.71 | 1.02 | 6.38 | 27.5 | 35.6 | 25.6  | 0.59 | 0.41 | 0.07 | 0.02 | 0.01 |
| 2    | L    | 2.73  | 1.93 | 1.69 | 7.38 | 15.8 | 26.8 | 28.3  | 1.41 | 1.62 | 0.37 | 0.17 | 0.10 |
| 3    | L    | 3.33  | 1.72 | 1.39 | 11.1 | 23.5 | 37.7 | 41.3  | 1.94 | 2.40 | 0.30 | 0.14 | 0.09 |
| 4    | L    | 0.69  | 1.20 | 1.20 | 5.45 | 19.0 | 26.8 | 29.1  | 0.58 | 0.58 | 0.13 | 0.04 | 0.03 |
| 5    | L    | 2.33  | 1.13 | 1.34 | 4.93 | 21.4 | 28.8 | 28.9  | 2.06 | 1.74 | 0.47 | 0.11 | 0.08 |
| 6    | L    | 4.61  | 1.80 | 0.43 | 7.74 | 32.8 | 42.8 | 38.9  | 2.56 | 10.7 | 0.60 | 0.14 | 0.11 |
| 7    | L    | 8.43  | 1.29 | 0.63 | 7.58 | 33.0 | 42.5 | 41.7  | 6.53 | 13.4 | 1.11 | 0.26 | 0.20 |
| 8    | L    | 4.33  | 1.05 | 0.10 | 7.59 | 28.7 | 37.4 | 44.8  | 4.12 | 43.3 | 0.57 | 0.15 | 0.12 |
| 9    | L    | 6.39  | 1.03 | 0.32 | 9.28 | 31.7 | 42.4 | 47.4  | 6.20 | 20.0 | 0.69 | 0.20 | 0.15 |
| 1    | MP   | 5.25  | 0.71 | 1.02 | 6.38 | 27.5 | 35.6 | 25.6  | 7.39 | 5.15 | 0.82 | 0.19 | 0.15 |
| 2    | MP   | 9.88  | 1.93 | 1.69 | 7.38 | 15.8 | 26.8 | 28.3  | 5.12 | 5.85 | 1.34 | 0.63 | 0.37 |
| 3    | MP   | 7.06  | 1.72 | 1.39 | 11.1 | 23.5 | 37.7 | 41.3  | 4.10 | 5.08 | 0.63 | 0.30 | 0.19 |
| 4    | MP   | 7.63  | 1.20 | 1.20 | 5.45 | 19.0 | 26.8 | 29.1  | 6.36 | 6.36 | 1.40 | 0.40 | 0.28 |
| 5    | MP   | 6.86  | 1.13 | 1.34 | 4.93 | 21.4 | 28.8 | 28.9  | 6.07 | 5.12 | 1.39 | 0.32 | 0.24 |
| 6    | MP   | 8.68  | 1.80 | 0.43 | 7.74 | 32.8 | 42.8 | 38.9  | 4.82 | 20.2 | 1.12 | 0.26 | 0.20 |
| 7    | MP   | 6.40  | 1.29 | 0.63 | 7.58 | 33.0 | 42.5 | 41.7  | 4.96 | 10.2 | 0.84 | 0.19 | 0.15 |
| 8    | MP   | 8.41  | 1.05 | 0.10 | 7.59 | 28.7 | 37.4 | 44.8  | 8.01 | 84.1 | 1.11 | 0.29 | 0.22 |
| 9    | MP   | 6.31  | 1.03 | 0.32 | 9.28 | 31.7 | 42.4 | 47.4  | 6.13 | 19.7 | 0.68 | 0.20 | 0.15 |

Note: BCF1= leave/F1; BCF2= leave/F2; BCF3= leave/F3; BCF4= leave/F4; BCF5= leave/SUM; F1= easily, freely or exchangeable fraction; F2= acid-reducible fraction; F3= oxidisable-organic fraction; F4= resistant fraction; SUM= summation of F1, F2, F3 and F4.

**Table S7.** Mean concentrations (mg/kg dry weight) of Cu in the leaf parts (lamina (L); midrib plus petiole (MP)) of *Rhizophora apiculata* and their habitat geochemical fraction sediments, with their bioconcentration factor (BCF) values in the mangrove of Sepang Besar River (1-4), and Lukut River (5-9) from the present study.

| Site | Part | Plant | F1   | F2   | F3   | F4   | SUM  | Total | BCF1 | BCF2 | BCF3 | BCF4 | BCF5 |
|------|------|-------|------|------|------|------|------|-------|------|------|------|------|------|
| 1    | L    | 13.4  | 0.19 | 0.38 | 7.54 | 19.4 | 27.5 | 22.7  | 70.6 | 35.3 | 1.78 | 0.69 | 0.49 |
| 2    | L    | 6.49  | 0.03 | 0.24 | 3.60 | 8.40 | 12.3 | 11.5  | 216  | 27.0 | 1.80 | 0.77 | 0.53 |
| 3    | L    | 1.85  | 0.05 | 0.13 | 4.47 | 11.5 | 16.1 | 15.3  | 37.0 | 14.2 | 0.41 | 0.16 | 0.11 |
| 4    | L    | 2.26  | 0.01 | 0.14 | 2.62 | 5.92 | 8.69 | 9.00  | 226  | 16.1 | 0.86 | 0.38 | 0.26 |
| 5    | L    | 5.77  | 0.13 | 0.03 | 4.29 | 8.83 | 13.3 | 13.8  | 44.4 | 192  | 1.34 | 0.65 | 0.43 |
| 6    | L    | 2.12  | 0.39 | 0.05 | 17.3 | 22.0 | 39.6 | 20.1  | 5.44 | 42.4 | 0.12 | 0.10 | 0.05 |
| 7    | L    | 4.06  | 0.19 | 0.14 | 9.24 | 16.4 | 25.9 | 11.3  | 21.4 | 29.0 | 0.44 | 0.25 | 0.16 |
| 8    | L    | 3.48  | 0.14 | 0.11 | 6.37 | 13.5 | 20.1 | 9.37  | 24.9 | 31.6 | 0.55 | 0.26 | 0.17 |
| 9    | L    | 0.69  | 0.12 | 0.07 | 8.73 | 15.9 | 24.8 | 9.52  | 5.75 | 9.86 | 0.08 | 0.04 | 0.03 |
| 1    | MP   | 10.8  | 0.19 | 0.38 | 7.54 | 19.4 | 27.5 | 22.7  | 56.7 | 28.4 | 1.43 | 0.55 | 0.39 |
| 2    | MP   | 3.65  | 0.03 | 0.24 | 3.60 | 8.40 | 12.3 | 11.5  | 122  | 15.2 | 1.01 | 0.43 | 0.30 |
| 3    | MP   | 1.53  | 0.05 | 0.13 | 4.47 | 11.5 | 16.1 | 15.3  | 30.6 | 11.8 | 0.34 | 0.13 | 0.09 |
| 4    | MP   | 1.54  | 0.01 | 0.14 | 2.62 | 5.92 | 8.69 | 9.00  | 154  | 11.0 | 0.59 | 0.26 | 0.18 |
| 5    | MP   | 5.24  | 0.13 | 0.03 | 4.29 | 8.83 | 13.3 | 13.8  | 40.3 | 175  | 1.22 | 0.59 | 0.39 |
| 6    | MP   | 1.96  | 0.39 | 0.05 | 17.3 | 22.0 | 39.6 | 20.1  | 5.03 | 39.2 | 0.11 | 0.09 | 0.05 |
| 7    | MP   | 3.05  | 0.19 | 0.14 | 9.24 | 16.4 | 25.9 | 11.3  | 16.1 | 21.8 | 0.33 | 0.19 | 0.12 |
| 8    | MP   | 2.65  | 0.14 | 0.11 | 6.37 | 13.5 | 20.1 | 9.37  | 18.9 | 24.1 | 0.42 | 0.20 | 0.13 |
|      | MP   | 1.96  | 0.12 | 0.07 | 8.73 | 15.9 | 24.8 | 9.52  | 16.3 | 28.0 | 0.22 | 0.12 | 0.08 |

Note: BCF1= leave/F1; BCF2= leave/F2; BCF3= leave/F3; BCF4= leave/F4; BCF5= leave/SUM; F1= easily, freely or exchangeable fraction; F2= acid-reducible fraction; F3= oxidisable-organic fraction; F4= resistant fraction; SUM= summation of F1, F2, F3 and F4.

**Table S8.** Mean concentrations (mg/kg dry weight) of Ni in the leaf parts (lamina (L); midrib plus petiole (MP)) of *Rhizophora apiculata* and their habitat geochemical fraction sediments, with their bioconcentration factor (BCF) values in the mangrove of Sepang Besar River (1-4), and Lukut River (5-9) from the present study.

| Site | Part | Plant | F1   | F2   | F3   | F4   | SUM   | Total Ni | BCF1   | BCF2  | BCF3 | BCF4 | BCF5 |
|------|------|-------|------|------|------|------|-------|----------|--------|-------|------|------|------|
| 1    | L    | 2.79  | 0.27 | 0.25 | 5.51 | 9.68 | 15.71 | 13.12    | 10.33  | 11.16 | 0.51 | 0.29 | 0.18 |
| 2    | L    | 1.35  | 0.39 | 0.14 | 3.57 | 5.72 | 9.82  | 9.90     | 3.46   | 9.64  | 0.38 | 0.24 | 0.14 |
| 3    | L    | 1.56  | 0.53 | 0.28 | 6.06 | 8.54 | 15.39 | 16.10    | 2.94   | 5.57  | 0.26 | 0.18 | 0.10 |
| 4    | L    | 2.36  | 0.35 | 0.25 | 2.61 | 4.84 | 8.06  | 8.49     | 6.74   | 9.44  | 0.90 | 0.49 | 0.29 |
| 5    | L    | 1.48  | 0.22 | 0.59 | 2.74 | 6.01 | 9.57  | 10.11    | 6.73   | 2.51  | 0.54 | 0.25 | 0.15 |
| 6    | L    | 3.60  | 0.30 | 0.42 | 4.41 | 8.30 | 13.42 | 13.29    | 12.00  | 8.57  | 0.82 | 0.43 | 0.27 |
| 7    | L    | 2.63  | 0.03 | 0.54 | 3.95 | 9.50 | 14.01 | 11.53    | 87.67  | 4.87  | 0.67 | 0.28 | 0.19 |
| 8    | L    | 3.32  | 0.65 | 0.50 | 3.03 | 8.00 | 12.18 | 11.23    | 5.11   | 6.64  | 1.10 | 0.42 | 0.27 |
| 9    | L    | 2.15  | 0.78 | 0.19 | 4.19 | 8.67 | 13.84 | 17.10    | 2.76   | 11.32 | 0.51 | 0.25 | 0.16 |
| 1    | MP   | 6.05  | 0.27 | 0.25 | 5.51 | 9.68 | 15.71 | 13.12    | 22.41  | 24.20 | 1.10 | 0.63 | 0.39 |
| 2    | MP   | 1.79  | 0.39 | 0.14 | 3.57 | 5.72 | 9.82  | 9.90     | 4.59   | 12.79 | 0.50 | 0.31 | 0.18 |
| 3    | MP   | 2.62  | 0.53 | 0.28 | 6.06 | 8.54 | 15.39 | 16.10    | 4.94   | 9.36  | 0.43 | 0.31 | 0.17 |
| 4    | MP   | 1.94  | 0.35 | 0.25 | 2.61 | 4.84 | 8.06  | 8.49     | 5.54   | 7.76  | 0.74 | 0.40 | 0.24 |
| 5    | MP   | 2.70  | 0.22 | 0.59 | 2.74 | 6.01 | 9.57  | 10.11    | 12.27  | 4.58  | 0.99 | 0.45 | 0.28 |
| 6    | MP   | 2.71  | 0.30 | 0.42 | 4.41 | 8.30 | 13.42 | 13.29    | 9.03   | 6.45  | 0.61 | 0.33 | 0.20 |
| 7    | MP   | 3.66  | 0.03 | 0.54 | 3.95 | 9.50 | 14.01 | 11.53    | 122.00 | 6.78  | 0.93 | 0.39 | 0.26 |
| 8    | MP   | 4.11  | 0.65 | 0.50 | 3.03 | 8.00 | 12.18 | 11.23    | 6.32   | 8.22  | 1.36 | 0.51 | 0.34 |
| 9    | MP   | 2.70  | 0.78 | 0.19 | 4.19 | 8.67 | 13.84 | 17.10    | 3.46   | 14.21 | 0.64 | 0.31 | 0.20 |

Note: BCF1= leave/F1; BCF2= leave/F2; BCF3= leave/F3; BCF4= leave/F4; BCF5= leave/SUM; F1= easily, freely or exchangeable fraction; F2= acid-reducible

fraction; F3= oxidisable-organic fraction; F4= resistant fraction; SUM= summation of F1, F2, F3 and F4.

## References

1. Hakanson, L. An Ecological Risk Index for Aquatic Pollution Control. a Sedimentological Approach. *Water Res.* **1980**, *14*, 975–1001, doi:10.1016/0043-1354(80)90143-8.
2. Wedepohl, K.H. The Composition of the Continental Crust. *Geochim. Cosmochim. Acta* **1995**, *59*, 1217–1232, doi:10.1016/0016-7037(95)00038-2.
3. Taylor, S.R.; McLennan, S.M. The Geochemical Evolution of the Continental Crust. *Rev. Geophys.* **1995**, *33*, 241–265, doi:https://doi.org/10.1029/95RG00262.
4. Rudnick, R.L.; Gao, S. 3.01 - Composition of the Continental Crust. In *Treatise on Geochemistry*; Holland, H.D., Turekian, K.K., Eds.; Pergamon: Oxford, 2003; 1–64 ISBN 978-0-08-043751-4.
5. Yap, C.K.; Arifin, N.; Tan, S.G. Relationships of Copper Concentrations between the Different Soft Tissues of *Telescopium telescopium* and the Surface Sediments Collected from Tropical Intertidal Areas. *Int. J. Chem.* **2013**, *5*, 8–19, doi:10.5539/ijc.v5n1p8.
6. Yap, C.K.; Noorhaidah, A.; Tan, S.G. Digestive Cecum and Tissue Redistribution in Gills of *Telescopium telescopium* as Indicators of Ni Bioavailabilities and Contamination in Tropical Intertidal Areas. *Water. Air. Soil Pollut.* **2012**, *223*, 2891–2905. <https://doi.org/10.1007/s11270-012-1073-0>.
7. Yap, C.K.; Noorhaidah, A. Gill and Digestive Caecum of *Telescopium telescopium* as Biomonitor of Pb Bioavailability and Contamination by Pb in the Tropical Intertidal Area. *Sains Malays.* **2011**, *40*, 175–1085.
8. Yap, C.K.; Noorhaidah, A.; Tan, S.G. Zn Concentrations in the Different Soft Tissues of *Telescopium telescopium* and Their Relationships with Zn Speciation by Sequential Extraction in Surface Sediments: A Statistical Multiple Linear Stepwise Regression Analysis. In *Gastropods: Diversity, Habitat, and Genetics*; Branchi, A.M., Fields, J.N., Eds.; Nova Science Publishers Inc.: New York, NY, USA, **2011**; pp. 127–148 ISBN 978-1-61324-695-5.
9. Cheng, W.H.; Yap, C.K. Potential human health risks from toxic metals via mangrove snail consumption and their ecological risk assessments in the habitat sediment from Peninsular Malaysia. *Chemosphere*, **2015**, *135*, 156–165.
10. Cheng, W.H., Yap, C.K., Ismail, A. and Abdul Rahim, I. Distribution and concentrations of Ni in tissues of the gastropod *Nerita lineata* collected from intertidal areas of Peninsular Malaysia. *Pertanika J. Trop. Agric. Sci.*, **2012**, *35* (4): 723–736.
11. Long, E.R.; MacDonald, D.D.; Smith, S.L.; Calder, F.D. Incidence of adverse biological effects within ranges of chemical concentrations in marine and estuarine sediments. *Environ. Manag.*, **1995**, *19*, 81–97.
12. Macdonald, D.D.; Carr, R.S.; Calder, F.D.; Long, E.R.; Ingersoll, C.G. Development and evaluation of sediment quality guidelines for Florida coastal waters. *Ecotoxicology*, **1996**, *5*(4), 253–278. <https://doi.org/10.1007/bf00118995>.
13. Chapman, P.M.; Allard, P.J.; Vigers, G.A. Development of Sediment Quality Values for Hong Kong Special Administrative Region: A Possible Model for Other Jurisdictions. *Mar. Pollut. Bull.* **1999**, *38*, 161–169, doi:10.1016/S0025-326X(98)00162-3.
